# Supplementary material
Source: Research Square preprint supplement (doi:10.21203/rs.3.rs-9011596/v1)
Supplement: Supplementary file 1 [file 8dc1da2d14f7078155ab24d0.docx]

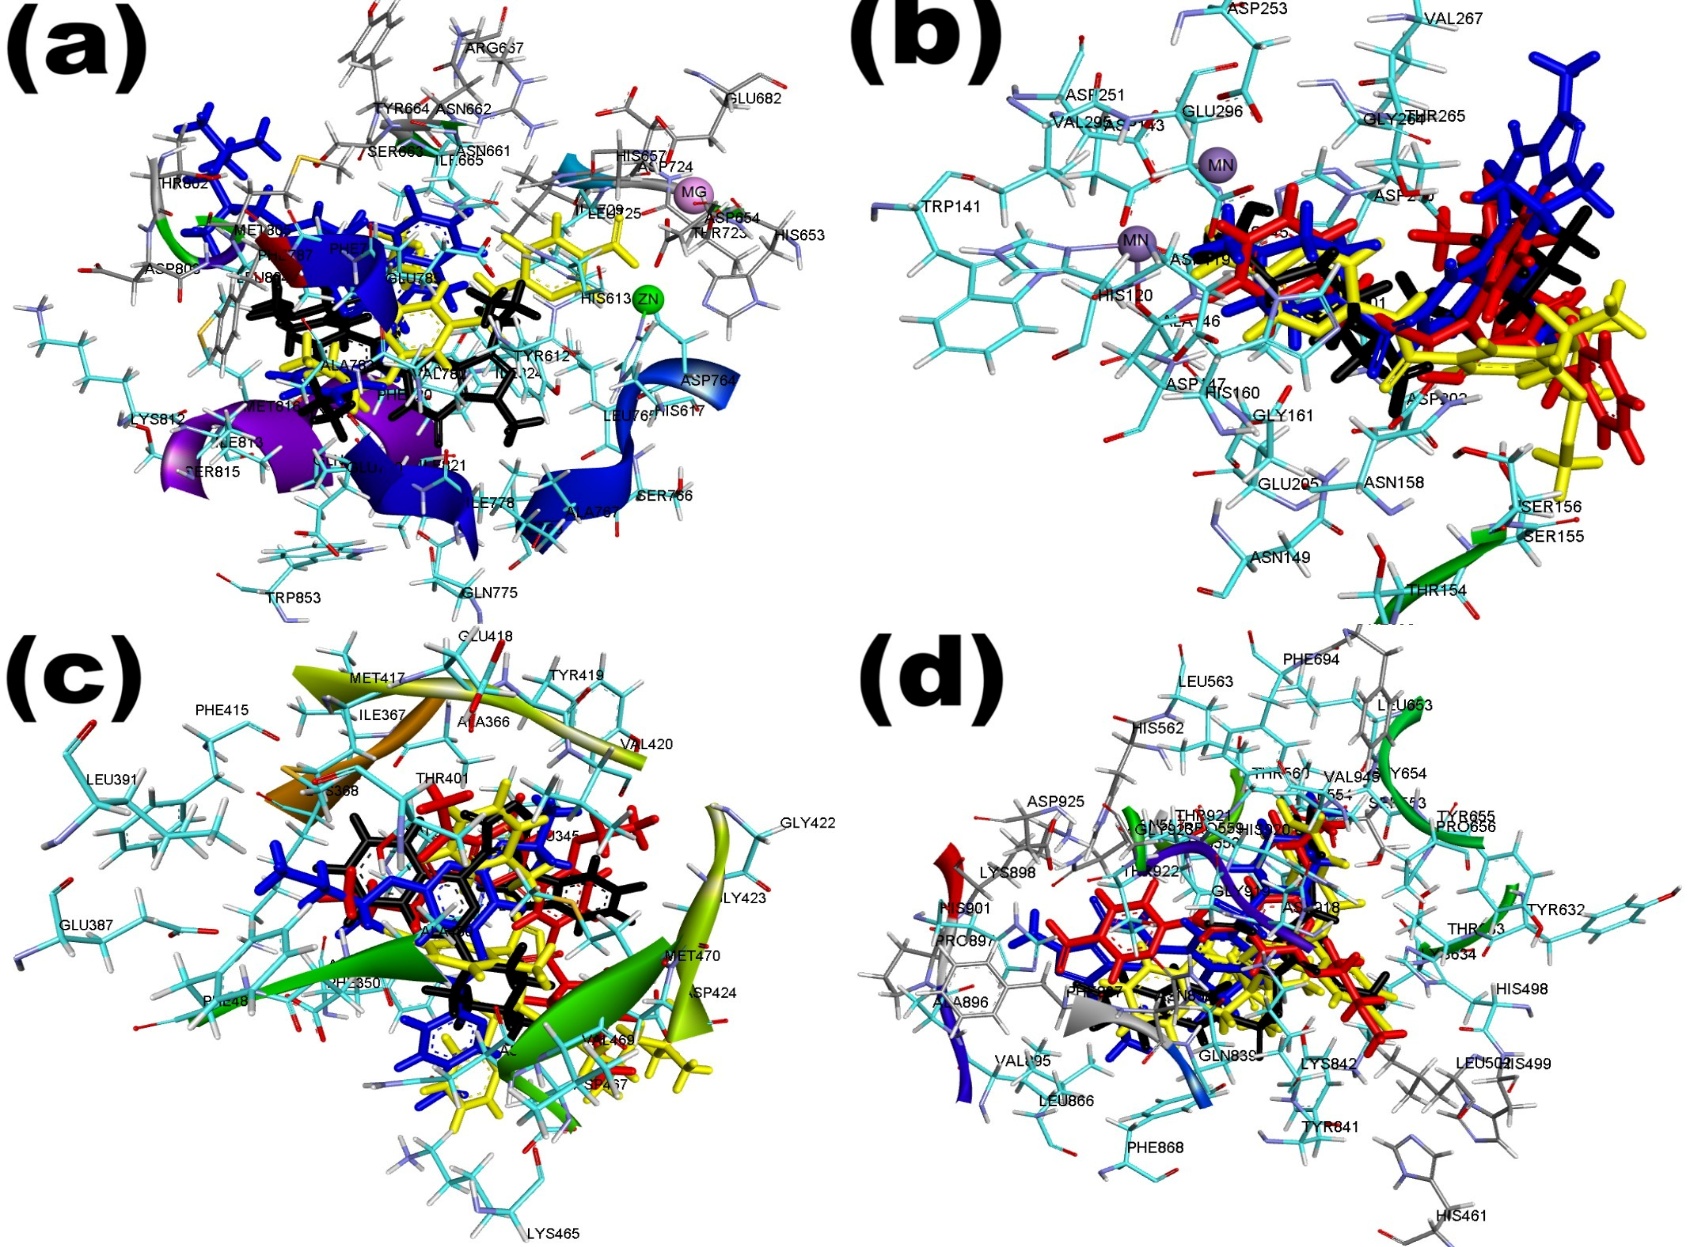


Figure S1: Superimposed structure of docked top-ranked compounds from ZINCPharmer pharmacophore search and sildenafil (standard drug) within the catalytic amino acid residues of (a) PDE-5 (b) arginase (c) PKC (d) O-GlcNAc on their native inhibitor (black). All had the same RMSD value of 0.5 Å

**Table S1:** Color codes of the compounds used in the docking validation

| **Compounds** | **PDE-5** | | **arginase** | | **PKC** | **O-GlcNAc** |
| --- | --- | --- | --- | --- | --- | --- |
| 6-[[2-(1-methoxypropan-2-yloxy)-6-propan-2-yloxypyridine-4-carbonyl]amino]pyridine-3-carboxylic acid **(Compound 1)** | Yellow | Yellow | | Blue | | Red |
| N-[1-[5-benzylsulfanyl-4-(5-chloro-2-methylphenyl)-1,2,4-triazol-3-yl]-2-phenylethyl]-3,5,5-trimethylhexanamide **(Compound 4)** | Blue | Red | | Yellow | | Yellow |
| Sildenafil (Standard drug) | Black | Blue | | Red | | Blue |
| Native ligand | - | Black | | Black | | Black |

**Table S2:** Docking scores of the top-ranked compounds from ZINCPharmer pharmacophore search erectile dysfunction targets

| **Target** | **Compound** | **Docking score (kcal/mol)** | **MM-GBSA (kcal/mol)** |
| --- | --- | --- | --- |
| PDE-5 (2H42) | 6-[[2-(1-methoxypropan-2-yloxy)-6-propan-2-yloxypyridine-4-carbonyl]amino]pyridine-3-carboxylic acid **(Compound 1)** | -9.06 | 17.79 |
| 2-dihydroxyphosphanyloxyethyl dihydrogen phosphite **(Compound 2)** | -3.64 | 22.75 |
| (2E,4E)-5-[4-(dibutylamino)phenyl]penta-2,4-dienoic acid **(Compound 3)** | -8.15 | 11.90 |
| N-[1-[5-benzylsulfanyl-4-(5-chloro-2-methylphenyl)-1,2,4-triazol-3-yl]-2-phenylethyl]-3,5,5-trimethylhexanamide **(Compound 4)** | -9.11 | -55.98 |
| Arginase (4I06) | 6-[[2-(1-methoxypropan-2-yloxy)-6-propan-2-yloxypyridine-4-carbonyl]amino]pyridine-3-carboxylic acid **(Compound 1)** | -4.10 | -3.63 |
| 2-dihydroxyphosphanyloxyethyl dihydrogen phosphite **(Compound 2)** | -5.39 | -2.31 |
| (2E,4E)-5-[4-(dibutylamino)phenyl]penta-2,4-dienoic acid **(Compound 3)** | -2.92 | 0.25 |
| N-[1-[5-benzylsulfanyl-4-(5-chloro-2-methylphenyl)-1,2,4-triazol-3-yl]-2-phenylethyl]-3,5,5-trimethylhexanamide **(Compound 4)** | -3.78 | 15.75 |
| PKC (3IW4) | 6-[[2-(1-methoxypropan-2-yloxy)-6-propan-2-yloxypyridine-4-carbonyl]amino]pyridine-3-carboxylic acid **(Compound 1)** | -5.73 | -34.58 |
| 2-dihydroxyphosphanyloxyethyl dihydrogen phosphite **(Compound 2)** | -2.91 | -18.88 |
| (2E,4E)-5-[4-(dibutylamino)phenyl]penta-2,4-dienoic acid **(Compound 3)** | -5.53 | -21.49 |
| N-[1-[5-benzylsulfanyl-4-(5-chloro-2-methylphenyl)-1,2,4-triazol-3-yl]-2-phenylethyl]-3,5,5-trimethylhexanamide **(Compound 4)** | -5.74 | -52.13 |
| O-GlcNAc (6MA5) | 6-[[2-(1-methoxypropan-2-yloxy)-6-propan-2-yloxypyridine-4-carbonyl]amino]pyridine-3-carboxylic acid **(Compound 1)** | -4.87 | -14.82 |
| 2-dihydroxyphosphanyloxyethyl dihydrogen phosphite **(Compound 2)** | -2.80 | -23.49 |
| (2E,4E)-5-[4-(dibutylamino)phenyl]penta-2,4-dienoic acid **(Compound 3)** | -3.36 | -35.22 |
| N-[1-[5-benzylsulfanyl-4-(5-chloro-2-methylphenyl)-1,2,4-triazol-3-yl]-2-phenylethyl]-3,5,5-trimethylhexanamide **(Compound 4)** | -5.01 | -45.41 |
